# Supplementary material for: Association between air pollution and bone mineral density: a Mendelian randomization study
Source: PubMed Central journal article supplement — Arch Med Sci. 2024 Aug 28;20(4):1334–8. doi: 10.5114/aoms/192628 (PMC11494361; doi:10.5114/aoms/192628), 2024-08-28
Supplement: AMS-20-4-192628-s1.pdf [file AMS-20-4-192628-s1.pdf]

**Supplementary Table SI.** Genetic variants significantly associated with air pollution exposure as instrumental variables and BMD as outcome

| N                    | SNP         | R <sup>2</sup> | F     | EA | OA | beta.exp  | se.exp   | pval.exp | samplesize.exp | beta.out  | se.out   | pval.out | samplesize.out |
|----------------------|-------------|----------------|-------|----|----|-----------|----------|----------|----------------|-----------|----------|----------|----------------|
| PM <sub>2.5</sub>    |             |                |       |    |    |           |          |          |                |           |          |          |                |
| 1                    | rs10961167  | 5.82E-05       | 24.67 | A  | G  | -1.93E-02 | 4.07E-03 | 2.00E-06 | 423796         | -6.66E-04 | 3.87E-03 | 8.63E-01 | 365403         |
| 2                    | rs11042316  | 6.51E-05       | 27.57 | A  | G  | -1.30E-02 | 2.50E-03 | 1.80E-07 | 423796         | 1.95E-03  | 2.39E-03 | 4.15E-01 | 365403         |
| 3                    | rs116925111 | 5.89E-05       | 24.96 | G  | T  | 5.33E-02  | 1.09E-02 | 9.10E-07 | 423796         | 4.41E-03  | 1.03E-02 | 6.67E-01 | 365403         |
| 4                    | rs117878224 | 5.34E-05       | 22.62 | G  | A  | -4.80E-02 | 1.01E-02 | 1.80E-06 | 423796         | 8.64E-03  | 9.69E-03 | 3.73E-01 | 365403         |
| 5                    | rs1217106   | 5.53E-05       | 23.42 | G  | A  | 1.27E-02  | 2.62E-03 | 1.20E-06 | 423796         | -2.83E-03 | 2.49E-03 | 2.55E-01 | 365403         |
| 6                    | rs12203592  | 1.57E-04       | 66.68 | T  | C  | 2.17E-02  | 2.59E-03 | 6.20E-17 | 423796         | -2.03E-03 | 2.57E-03 | 4.30E-01 | 365403         |
| 7                    | rs1318845   | 6.29E-05       | 26.64 | C  | T  | -1.40E-02 | 2.70E-03 | 2.30E-07 | 423796         | 4.06E-04  | 2.58E-03 | 8.75E-01 | 365403         |
| 8                    | rs1372504   | 7.08E-05       | 29.99 | A  | G  | 1.23E-02  | 2.22E-03 | 3.10E-08 | 423796         | -3.37E-03 | 2.12E-03 | 1.12E-01 | 365403         |
| 9                    | rs1537371   | 7.65E-05       | 32.43 | A  | C  | 1.24E-02  | 2.15E-03 | 8.50E-09 | 423796         | 1.26E-03  | 2.05E-03 | 5.39E-01 | 365403         |
| 10                   | rs16957755  | 5.66E-05       | 23.97 | C  | T  | 2.17E-02  | 4.38E-03 | 7.60E-07 | 423796         | 7.92E-05  | 4.20E-03 | 9.85E-01 | 365403         |
| 11                   | rs17183854  | 5.02E-05       | 21.27 | G  | T  | -4.34E-02 | 9.42E-03 | 4.00E-06 | 423796         | -1.13E-03 | 9.10E-03 | 9.01E-01 | 365403         |
| 12                   | rs17657881  | 4.91E-05       | 20.79 | C  | T  | -3.71E-02 | 8.05E-03 | 4.00E-06 | 423796         | -1.32E-05 | 7.71E-03 | 9.99E-01 | 365403         |
| 13                   | rs2141531   | 5.46E-05       | 23.14 | G  | T  | -1.14E-02 | 2.36E-03 | 1.30E-06 | 423796         | 2.64E-03  | 2.28E-03 | 2.47E-01 | 365403         |
| 14                   | rs2292156   | 6.01E-05       | 25.48 | T  | G  | 1.47E-02  | 2.88E-03 | 3.40E-07 | 423796         | -5.31E-03 | 2.75E-03 | 5.35E-02 | 365403         |
| 15                   | rs27152     | 5.13E-05       | 21.73 | T  | C  | -1.07E-02 | 2.31E-03 | 3.20E-06 | 423796         | 3.74E-03  | 2.20E-03 | 8.99E-02 | 365403         |
| 16                   | rs35703574  | 5.71E-05       | 24.19 | A  | G  | -2.47E-02 | 5.35E-03 | 3.90E-06 | 423796         | -2.41E-03 | 5.06E-03 | 6.34E-01 | 365403         |
| 17                   | rs56068671  | 5.04E-05       | 21.38 | T  | G  | -1.82E-02 | 3.93E-03 | 3.60E-06 | 423796         | 1.15E-03  | 3.78E-03 | 7.61E-01 | 365403         |
| 18                   | rs58824859  | 6.68E-05       | 28.31 | C  | A  | 1.20E-02  | 2.31E-03 | 1.90E-07 | 423796         | 1.87E-03  | 2.20E-03 | 3.95E-01 | 365403         |
| 19                   | rs6134106   | 4.84E-05       | 20.53 | A  | C  | 5.44E-02  | 1.19E-02 | 4.80E-06 | 423796         | 7.94E-03  | 1.16E-02 | 4.95E-01 | 365403         |
| 20                   | rs62119705  | 5.58E-05       | 23.66 | T  | C  | 1.11E-02  | 2.27E-03 | 8.90E-07 | 423796         | -4.79E-03 | 2.16E-03 | 2.65E-02 | 365403         |
| 21                   | rs62484669  | 5.60E-05       | 23.72 | A  | G  | 1.78E-02  | 3.62E-03 | 8.60E-07 | 423796         | -4.48E-03 | 3.50E-03 | 2.00E-01 | 365403         |
| 22                   | rs6547952   | 5.62E-05       | 23.83 | G  | T  | -1.11E-02 | 2.28E-03 | 1.20E-06 | 423796         | 1.79E-03  | 2.19E-03 | 4.14E-01 | 365403         |
| 23                   | rs72655898  | 5.23E-05       | 22.17 | G  | A  | -1.13E-02 | 2.40E-03 | 2.40E-06 | 423796         | 7.15E-04  | 2.29E-03 | 7.55E-01 | 365403         |
| 24                   | rs72808024  | 6.57E-05       | 27.86 | C  | A  | -1.61E-02 | 3.02E-03 | 9.90E-08 | 423796         | 6.60E-03  | 2.87E-03 | 2.14E-02 | 365403         |
| 25                   | rs7573056   | 6.42E-05       | 27.21 | C  | A  | -1.14E-02 | 2.17E-03 | 1.50E-07 | 423796         | 2.69E-03  | 2.08E-03 | 1.97E-01 | 365403         |
| 26                   | rs77255816  | 6.93E-05       | 29.38 | T  | C  | 3.14E-02  | 5.73E-03 | 4.20E-08 | 423796         | -9.86E-03 | 5.54E-03 | 7.51E-02 | 365403         |
| 27                   | rs7776279   | 4.89E-05       | 20.73 | A  | G  | 1.09E-02  | 2.39E-03 | 4.40E-06 | 423796         | -4.19E-03 | 2.29E-03 | 6.77E-02 | 365403         |
| 28                   | rs78230389  | 5.66E-05       | 24.00 | G  | A  | -4.68E-02 | 9.48E-03 | 8.10E-07 | 423796         | 1.25E-03  | 8.98E-03 | 8.90E-01 | 365403         |
| 29                   | rs78539764  | 6.06E-05       | 25.70 | C  | T  | -3.35E-02 | 6.59E-03 | 3.70E-07 | 423796         | 1.24E-02  | 6.26E-03 | 4.84E-02 | 365403         |
| 30                   | rs80123875  | 5.89E-05       | 24.97 | T  | G  | -1.87E-02 | 3.87E-03 | 1.30E-06 | 423796         | 3.22E-03  | 3.66E-03 | 3.80E-01 | 365403         |
| 31                   | rs9260734   | 5.02E-05       | 21.28 | A  | G  | 1.40E-02  | 3.00E-03 | 3.10E-06 | 423796         | 8.34E-04  | 2.90E-03 | 7.74E-01 | 365403         |
| 32                   | rs9644485   | 4.86E-05       | 20.60 | C  | T  | 9.87E-03  | 2.16E-03 | 4.90E-06 | 423796         | -2.25E-03 | 2.06E-03 | 2.74E-01 | 365403         |
| PM <sub>2.5-10</sub> |             |                |       |    |    |           |          |          |                |           |          |          |                |
| 1                    | rs1157546   | 6.08E-05       | 25.77 | C  | T  | -2.46E-02 | 4.90E-03 | 5.20E-07 | 423796         | 3.34E-03  | 4.70E-03 | 4.77E-01 | 365403         |
| 2                    | rs11621531  | 6.40E-05       | 27.13 | A  | G  | -2.31E-02 | 4.49E-03 | 2.50E-07 | 423796         | 5.53E-05  | 4.20E-03 | 9.89E-01 | 365403         |
| 3                    | rs116259145 | 5.64E-05       | 23.89 | A  | C  | 3.02E-02  | 6.19E-03 | 1.10E-06 | 423796         | -1.04E-03 | 5.81E-03 | 8.58E-01 | 365403         |
| 4                    | rs116816317 | 5.49E-05       | 23.28 | A  | G  | 3.76E-02  | 7.97E-03 | 2.30E-06 | 423796         | -3.27E-03 | 7.60E-03 | 6.67E-01 | 365403         |
| 5                    | rs117389221 | 5.49E-05       | 23.25 | C  | T  | -4.02E-02 | 8.50E-03 | 2.20E-06 | 423796         | 6.83E-04  | 7.93E-03 | 9.31E-01 | 365403         |
| 6                    | rs118101191 | 7.15E-05       | 30.31 | T  | G  | 5.98E-02  | 1.11E-02 | 6.50E-08 | 423796         | -8.34E-04 | 1.05E-02 | 9.37E-01 | 365403         |
| 7                    | rs12462492  | 5.86E-05       | 24.86 | T  | G  | -1.24E-02 | 2.50E-03 | 6.90E-07 | 423796         | -3.58E-04 | 2.35E-03 | 8.79E-01 | 365403         |
| 8                    | rs13125748  | 5.02E-05       | 21.28 | A  | C  | 1.15E-02  | 2.50E-03 | 4.70E-06 | 423796         | 5.72E-04  | 2.37E-03 | 8.09E-01 | 365403         |
| 9                    | rs138141967 | 5.44E-05       | 23.06 | T  | G  | -4.29E-02 | 9.15E-03 | 2.70E-06 | 423796         | -4.82E-05 | 8.82E-03 | 9.96E-01 | 365403         |
| 10                   | rs1706918   | 6.00E-05       | 25.44 | A  | G  | 1.83E-02  | 3.68E-03 | 6.00E-07 | 423796         | -1.65E-05 | 3.52E-03 | 9.96E-01 | 365403         |
| 11                   | rs17675316  | 5.76E-05       | 24.43 | G  | A  | 3.69E-02  | 7.88E-03 | 2.80E-06 | 423796         | -2.74E-04 | 7.55E-03 | 9.71E-01 | 365403         |
| 12                   | rs57048268  | 5.21E-05       | 22.07 | C  | A  | -1.10E-02 | 2.37E-03 | 3.20E-06 | 423796         | 1.72E-03  | 2.26E-03 | 4.46E-01 | 365403         |
| 13                   | rs605027    | 5.12E-05       | 21.71 | T  | C  | -1.14E-02 | 2.45E-03 | 3.40E-06 | 423796         | 3.71E-03  | 2.34E-03 | 1.12E-01 | 365403         |
| 14                   | rs62079137  | 5.77E-05       | 24.47 | C  | T  | -1.74E-02 | 3.74E-03 | 3.60E-06 | 423796         | -1.25E-03 | 3.55E-03 | 7.23E-01 | 365403         |
| 15                   | rs71323440  | 5.40E-05       | 22.89 | T  | C  | 1.63E-02  | 3.41E-03 | 1.70E-06 | 423796         | 2.85E-03  | 3.24E-03 | 3.79E-01 | 365403         |
| 16                   | rs76170056  | 5.38E-05       | 22.78 | A  | C  | 1.65E-02  | 3.46E-03 | 1.90E-06 | 423796         | 5.29E-03  | 3.31E-03 | 1.10E-01 | 365403         |
| 17                   | rs78060907  | 5.77E-05       | 24.46 | A  | C  | -3.81E-02 | 7.70E-03 | 7.70E-07 | 423796         | 1.02E-02  | 7.18E-03 | 1.55E-01 | 365403         |
| 18                   | rs9497937   | 5.82E-05       | 24.67 | A  | C  | -1.28E-02 | 2.58E-03 | 7.20E-07 | 423796         | -3.83E-03 | 2.45E-03 | 1.18E-01 | 365403         |
| PM <sub>10</sub>     |             |                |       |    |    |           |          |          |                |           |          |          |                |
| 1                    | rs10088658  | 4.56E-05       | 20.77 | G  | A  | -1.01E-02 | 2.09E-03 | 1.20E-06 | 455314         | 9.07E-04  | 2.18E-03 | 6.77E-01 | 365403         |
| 2                    | rs10104149  | 4.75E-05       | 21.62 | G  | A  | 3.08E-02  | 6.24E-03 | 7.80E-07 | 455314         | -5.13E-03 | 6.60E-03 | 4.37E-01 | 365403         |
| 3                    | rs10498638  | 6.00E-05       | 27.34 | C  | T  | 1.40E-02  | 2.54E-03 | 3.30E-08 | 455314         | -2.60E-03 | 2.64E-03 | 3.24E-01 | 365403         |

|    |             |          |       |   |   |           |          |          |        |           |          |          |        |
|----|-------------|----------|-------|---|---|-----------|----------|----------|--------|-----------|----------|----------|--------|
| 4  | rs10823487  | 4.54E-05 | 20.65 | T | G | 9.62E-03  | 1.99E-03 | 1.40E-06 | 455314 | -2.88E-03 | 2.09E-03 | 1.67E-01 | 365403 |
| 5  | rs10874235  | 4.04E-05 | 18.40 | T | C | -9.73E-03 | 2.12E-03 | 4.60E-06 | 455314 | -1.28E-03 | 2.23E-03 | 5.68E-01 | 365403 |
| 6  | rs10889408  | 4.19E-05 | 19.08 | A | G | 9.16E-03  | 1.97E-03 | 3.30E-06 | 455314 | -8.64E-04 | 2.07E-03 | 6.76E-01 | 365403 |
| 7  | rs10906340  | 4.58E-05 | 20.88 | T | C | -1.51E-02 | 3.11E-03 | 1.20E-06 | 455314 | -1.99E-03 | 3.24E-03 | 5.40E-01 | 365403 |
| 8  | rs10983735  | 4.07E-05 | 18.52 | A | G | 1.25E-02  | 2.72E-03 | 4.60E-06 | 455314 | 2.13E-03  | 2.85E-03 | 4.55E-01 | 365403 |
| 9  | rs11027689  | 4.16E-05 | 18.95 | A | G | -9.59E-03 | 2.07E-03 | 3.60E-06 | 455314 | 6.45E-04  | 2.17E-03 | 7.66E-01 | 365403 |
| 10 | rs11120971  | 4.58E-05 | 20.87 | C | A | -1.05E-02 | 2.16E-03 | 1.10E-06 | 455314 | -2.23E-03 | 2.27E-03 | 3.25E-01 | 365403 |
| 11 | rs111419645 | 4.09E-05 | 18.62 | C | A | 2.43E-02  | 5.28E-03 | 4.20E-06 | 455314 | 2.79E-03  | 5.52E-03 | 6.14E-01 | 365403 |
| 12 | rs111536585 | 5.60E-05 | 25.48 | A | C | -3.56E-02 | 6.90E-03 | 2.50E-07 | 455314 | 7.88E-03  | 7.20E-03 | 2.74E-01 | 365403 |
| 13 | rs111897525 | 5.06E-05 | 23.03 | A | C | -2.35E-02 | 4.62E-03 | 3.70E-07 | 455314 | -4.07E-03 | 4.80E-03 | 3.97E-01 | 365403 |
| 14 | rs112307532 | 4.56E-05 | 20.77 | T | G | -2.50E-02 | 5.14E-03 | 1.10E-06 | 455314 | -1.91E-03 | 5.41E-03 | 7.24E-01 | 365403 |
| 15 | rs112965629 | 4.59E-05 | 20.90 | C | T | -2.99E-02 | 6.14E-03 | 1.10E-06 | 455314 | -2.39E-03 | 6.40E-03 | 7.09E-01 | 365403 |
| 16 | rs113577116 | 4.71E-05 | 21.43 | A | G | -6.51E-02 | 1.42E-02 | 4.90E-06 | 455314 | 1.23E-02  | 1.51E-02 | 4.17E-01 | 365403 |
| 17 | rs114789974 | 6.31E-05 | 28.75 | A | C | -5.52E-02 | 9.63E-03 | 1.00E-08 | 455314 | 1.09E-02  | 1.02E-02 | 2.84E-01 | 365403 |
| 18 | rs115057100 | 4.08E-05 | 18.58 | G | A | 3.14E-02  | 6.85E-03 | 4.40E-06 | 455314 | -4.20E-03 | 7.07E-03 | 5.52E-01 | 365403 |
| 19 | rs115302993 | 4.52E-05 | 20.57 | C | T | -2.76E-02 | 5.71E-03 | 1.30E-06 | 455314 | 1.25E-02  | 5.89E-03 | 3.33E-02 | 365403 |
| 20 | rs115319635 | 4.24E-05 | 19.33 | C | T | 1.61E-02  | 3.50E-03 | 3.90E-06 | 455314 | -4.41E-03 | 3.67E-03 | 2.30E-01 | 365403 |
| 21 | rs116152878 | 4.07E-05 | 18.52 | A | G | -2.66E-02 | 5.81E-03 | 4.60E-06 | 455314 | -2.76E-03 | 6.06E-03 | 6.48E-01 | 365403 |
| 22 | rs116374079 | 6.38E-05 | 29.06 | T | C | 4.63E-02  | 8.67E-03 | 9.30E-08 | 455314 | -7.84E-03 | 9.08E-03 | 3.88E-01 | 365403 |
| 23 | rs11644580  | 6.11E-05 | 27.82 | C | T | -1.48E-02 | 2.87E-03 | 2.50E-07 | 455314 | 7.03E-03  | 2.99E-03 | 1.88E-02 | 365403 |
| 24 | rs11663540  | 4.55E-05 | 20.73 | T | G | 1.28E-02  | 2.64E-03 | 1.30E-06 | 455314 | -3.46E-03 | 2.76E-03 | 2.09E-01 | 365403 |
| 25 | rs11673189  | 4.55E-05 | 20.71 | A | G | -1.09E-02 | 2.25E-03 | 1.30E-06 | 455314 | -1.62E-03 | 2.34E-03 | 4.88E-01 | 365403 |
| 26 | rs11674520  | 4.57E-05 | 20.83 | G | A | 9.72E-03  | 2.00E-03 | 1.10E-06 | 455314 | -4.12E-03 | 2.10E-03 | 4.96E-02 | 365403 |
| 27 | rs11682045  | 4.92E-05 | 22.39 | A | G | -1.02E-02 | 2.02E-03 | 4.90E-07 | 455314 | 3.39E-03  | 2.13E-03 | 1.12E-01 | 365403 |
| 28 | rs117323841 | 5.20E-05 | 23.69 | T | C | -2.54E-02 | 5.04E-03 | 4.70E-07 | 455314 | -4.21E-04 | 5.28E-03 | 9.36E-01 | 365403 |
| 29 | rs11747926  | 4.31E-05 | 19.63 | G | A | -1.26E-02 | 2.68E-03 | 2.30E-06 | 455314 | 3.69E-03  | 2.81E-03 | 1.89E-01 | 365403 |
| 30 | rs117529040 | 4.43E-05 | 20.16 | T | C | 4.19E-02  | 8.80E-03 | 1.90E-06 | 455314 | 1.17E-02  | 9.50E-03 | 2.17E-01 | 365403 |
| 31 | rs117876623 | 5.44E-05 | 24.78 | C | T | 1.42E-02  | 2.78E-03 | 2.90E-07 | 455314 | -4.80E-03 | 2.91E-03 | 9.85E-02 | 365403 |
| 32 | rs117904745 | 4.67E-05 | 21.27 | C | T | -3.05E-02 | 6.20E-03 | 8.70E-07 | 455314 | 5.07E-04  | 6.45E-03 | 9.37E-01 | 365403 |
| 33 | rs118081621 | 4.99E-05 | 22.71 | C | A | -2.54E-02 | 5.00E-03 | 3.70E-07 | 455314 | -4.86E-03 | 5.20E-03 | 3.50E-01 | 365403 |
| 34 | rs11901904  | 4.50E-05 | 20.49 | T | C | -1.56E-02 | 3.24E-03 | 1.50E-06 | 455314 | 3.59E-03  | 3.40E-03 | 2.91E-01 | 365403 |
| 35 | rs12503405  | 4.52E-05 | 20.59 | A | G | 1.81E-02  | 3.75E-03 | 1.30E-06 | 455314 | -7.75E-03 | 3.97E-03 | 5.11E-02 | 365403 |
| 36 | rs12789494  | 4.20E-05 | 19.10 | T | G | 1.16E-02  | 2.49E-03 | 3.50E-06 | 455314 | -2.11E-03 | 2.60E-03 | 4.16E-01 | 365403 |
| 37 | rs12876420  | 5.15E-05 | 23.46 | A | G | 1.63E-02  | 3.33E-03 | 9.80E-07 | 455314 | -2.10E-03 | 3.47E-03 | 5.45E-01 | 365403 |
| 38 | rs13084230  | 5.89E-05 | 26.83 | T | C | -1.36E-02 | 2.46E-03 | 3.50E-08 | 455314 | 8.18E-04  | 2.57E-03 | 7.50E-01 | 365403 |
| 39 | rs13122455  | 6.28E-05 | 28.57 | T | C | -1.40E-02 | 2.46E-03 | 1.30E-08 | 455314 | 2.33E-03  | 2.58E-03 | 3.66E-01 | 365403 |
| 40 | rs13389224  | 5.58E-05 | 25.41 | T | C | -1.06E-02 | 1.99E-03 | 9.30E-08 | 455314 | 4.52E-03  | 2.10E-03 | 3.12E-02 | 365403 |
| 41 | rs1376695   | 4.51E-05 | 20.52 | G | A | -1.02E-02 | 2.12E-03 | 1.40E-06 | 455314 | 3.10E-04  | 2.21E-03 | 8.89E-01 | 365403 |
| 42 | rs1381273   | 4.22E-05 | 19.22 | T | C | 9.24E-03  | 1.98E-03 | 3.20E-06 | 455314 | -9.38E-05 | 2.07E-03 | 9.64E-01 | 365403 |
| 43 | rs138604729 | 4.90E-05 | 22.33 | A | G | -2.49E-02 | 4.99E-03 | 6.30E-07 | 455314 | 1.00E-02  | 5.26E-03 | 5.73E-02 | 365403 |
| 44 | rs140767537 | 4.87E-05 | 22.17 | A | C | 2.05E-02  | 4.27E-03 | 1.50E-06 | 455314 | -2.66E-03 | 4.48E-03 | 5.53E-01 | 365403 |
| 45 | rs141052416 | 4.78E-05 | 21.78 | A | C | -4.56E-02 | 9.34E-03 | 1.10E-06 | 455314 | 1.07E-02  | 9.87E-03 | 2.77E-01 | 365403 |
| 46 | rs141645281 | 5.28E-05 | 24.03 | T | C | -4.81E-02 | 9.46E-03 | 3.80E-07 | 455314 | -3.33E-03 | 1.00E-02 | 7.40E-01 | 365403 |
| 47 | rs141783874 | 4.84E-05 | 22.04 | T | G | 6.42E-02  | 1.36E-02 | 2.50E-06 | 455314 | -1.70E-03 | 1.44E-02 | 9.06E-01 | 365403 |
| 48 | rs142169179 | 6.42E-05 | 29.22 | A | G | 4.02E-02  | 7.34E-03 | 4.40E-08 | 455314 | -5.78E-03 | 7.62E-03 | 4.48E-01 | 365403 |
| 49 | rs142549682 | 4.39E-05 | 19.98 | A | G | 4.00E-02  | 8.58E-03 | 3.10E-06 | 455314 | 3.84E-03  | 9.05E-03 | 6.72E-01 | 365403 |
| 50 | rs142871762 | 4.61E-05 | 21.01 | A | G | 3.08E-02  | 6.31E-03 | 1.00E-06 | 455314 | -3.98E-03 | 6.67E-03 | 5.51E-01 | 365403 |
| 51 | rs143699179 | 4.34E-05 | 19.78 | T | C | 5.54E-02  | 1.21E-02 | 4.80E-06 | 455314 | -2.16E-02 | 1.28E-02 | 9.22E-02 | 365403 |
| 52 | rs144317094 | 5.59E-05 | 25.45 | A | C | -4.16E-02 | 8.25E-03 | 4.70E-07 | 455314 | 1.35E-02  | 8.74E-03 | 1.24E-01 | 365403 |
| 53 | rs147214297 | 5.66E-05 | 25.79 | T | C | -3.51E-02 | 6.71E-03 | 1.70E-07 | 455314 | 1.13E-02  | 7.00E-03 | 1.07E-01 | 365403 |
| 54 | rs1475628   | 4.80E-05 | 21.87 | T | C | -1.13E-02 | 2.26E-03 | 6.20E-07 | 455314 | 4.14E-03  | 2.36E-03 | 7.91E-02 | 365403 |
| 55 | rs147895162 | 5.97E-05 | 27.20 | C | T | -4.48E-02 | 8.11E-03 | 3.40E-08 | 455314 | 9.40E-04  | 8.44E-03 | 9.11E-01 | 365403 |
| 56 | rs149254120 | 4.64E-05 | 21.12 | A | G | -5.52E-02 | 1.18E-02 | 3.10E-06 | 455314 | 1.01E-02  | 1.22E-02 | 4.08E-01 | 365403 |
| 57 | rs16981175  | 4.60E-05 | 20.96 | A | G | -1.68E-02 | 3.44E-03 | 1.10E-06 | 455314 | -2.31E-03 | 3.60E-03 | 5.22E-01 | 365403 |
| 58 | rs16995919  | 6.14E-05 | 27.96 | T | C | 2.48E-02  | 4.77E-03 | 2.00E-07 | 455314 | -6.09E-03 | 4.98E-03 | 2.22E-01 | 365403 |
| 59 | rs17017032  | 4.08E-05 | 18.56 | A | G | 4.68E-02  | 1.02E-02 | 4.40E-06 | 455314 | 1.25E-02  | 1.08E-02 | 2.47E-01 | 365403 |
| 60 | rs17103245  | 4.73E-05 | 21.52 | G | A | 1.03E-02  | 2.09E-03 | 8.60E-07 | 455314 | 1.22E-03  | 2.17E-03 | 5.74E-01 | 365403 |
| 61 | rs17132724  | 5.48E-05 | 24.95 | A | G | -5.73E-02 | 1.08E-02 | 1.20E-07 | 455314 | -3.28E-03 | 1.11E-02 | 7.67E-01 | 365403 |
| 62 | rs17268792  | 4.42E-05 | 20.12 | A | G | 1.52E-02  | 3.18E-03 | 1.80E-06 | 455314 | 2.15E-03  | 3.37E-03 | 5.24E-01 | 365403 |
| 63 | rs1737333   | 4.71E-05 | 21.46 | C | T | 1.09E-02  | 2.21E-03 | 8.00E-07 | 455314 | -3.08E-03 | 2.32E-03 | 1.84E-01 | 365403 |
| 64 | rs17377309  | 4.66E-05 | 21.22 | T | C | -1.61E-02 | 3.33E-03 | 1.40E-06 | 455314 | 1.04E-03  | 3.49E-03 | 7.64E-01 | 365403 |

|     |             |          |       |   |   |           |          |          |        |           |          |          |        |
|-----|-------------|----------|-------|---|---|-----------|----------|----------|--------|-----------|----------|----------|--------|
| 65  | rs17658327  | 4.30E-05 | 19.58 | C | T | 4.50E-02  | 9.65E-03 | 3.10E-06 | 455314 | 9.89E-03  | 1.02E-02 | 3.32E-01 | 365403 |
| 66  | rs17706942  | 4.21E-05 | 19.19 | C | T | 2.20E-02  | 4.73E-03 | 3.40E-06 | 455314 | 6.11E-04  | 4.96E-03 | 9.02E-01 | 365403 |
| 67  | rs17728367  | 4.45E-05 | 20.27 | T | C | 1.09E-02  | 2.27E-03 | 1.60E-06 | 455314 | 3.01E-03  | 2.37E-03 | 2.03E-01 | 365403 |
| 68  | rs17756061  | 5.45E-05 | 24.81 | A | G | 1.66E-02  | 3.15E-03 | 1.40E-07 | 455314 | 2.76E-03  | 3.27E-03 | 3.99E-01 | 365403 |
| 69  | rs1789990   | 5.06E-05 | 23.03 | T | G | 1.01E-02  | 1.98E-03 | 3.80E-07 | 455314 | 2.64E-04  | 2.08E-03 | 8.99E-01 | 365403 |
| 70  | rs185248    | 4.54E-05 | 20.66 | G | A | 1.46E-02  | 3.01E-03 | 1.30E-06 | 455314 | -3.26E-03 | 3.17E-03 | 3.04E-01 | 365403 |
| 71  | rs186595360 | 6.20E-05 | 28.23 | C | T | -4.67E-02 | 8.81E-03 | 1.20E-07 | 455314 | 2.77E-03  | 9.19E-03 | 7.63E-01 | 365403 |
| 72  | rs202241631 | 9.42E-05 | 42.92 | A | G | 2.02E-02  | 3.95E-03 | 3.10E-07 | 455314 | -2.79E-03 | 4.16E-03 | 5.03E-01 | 365403 |
| 73  | rs2213533   | 5.05E-05 | 22.99 | A | C | 1.06E-02  | 2.09E-03 | 4.00E-07 | 455314 | 6.80E-05  | 2.17E-03 | 9.75E-01 | 365403 |
| 74  | rs2230098   | 4.96E-05 | 22.58 | G | A | -2.10E-02 | 4.30E-03 | 9.90E-07 | 455314 | 4.13E-03  | 4.43E-03 | 3.51E-01 | 365403 |
| 75  | rs229100    | 4.23E-05 | 19.27 | C | T | -1.26E-02 | 2.69E-03 | 2.80E-06 | 455314 | 1.38E-03  | 2.80E-03 | 6.23E-01 | 365403 |
| 76  | rs2298236   | 4.59E-05 | 20.91 | C | T | 1.65E-02  | 3.39E-03 | 1.20E-06 | 455314 | 3.27E-03  | 3.57E-03 | 3.60E-01 | 365403 |
| 77  | rs2516973   | 5.85E-05 | 26.63 | C | T | 1.19E-02  | 2.53E-03 | 2.60E-06 | 455314 | -2.32E-05 | 2.63E-03 | 9.93E-01 | 365403 |
| 78  | rs2585823   | 4.64E-05 | 21.11 | A | G | 1.03E-02  | 2.11E-03 | 9.80E-07 | 455314 | -3.04E-03 | 2.21E-03 | 1.69E-01 | 365403 |
| 79  | rs2838518   | 4.40E-05 | 20.05 | A | C | -2.80E-02 | 5.87E-03 | 1.90E-06 | 455314 | 5.91E-03  | 6.11E-03 | 3.33E-01 | 365403 |
| 80  | rs3213261   | 4.34E-05 | 19.77 | A | G | -2.93E-02 | 6.33E-03 | 3.80E-06 | 455314 | 5.16E-05  | 6.57E-03 | 9.94E-01 | 365403 |
| 81  | rs343311    | 5.05E-05 | 23.01 | A | G | -1.02E-02 | 1.99E-03 | 3.00E-07 | 455314 | -1.67E-03 | 2.08E-03 | 4.22E-01 | 365403 |
| 82  | rs35024573  | 6.05E-05 | 27.56 | C | T | -2.19E-02 | 4.42E-03 | 7.40E-07 | 455314 | 4.10E-03  | 4.59E-03 | 3.72E-01 | 365403 |
| 83  | rs35435530  | 5.14E-05 | 23.38 | T | G | 1.81E-02  | 3.70E-03 | 9.70E-07 | 455314 | -4.17E-03 | 3.86E-03 | 2.79E-01 | 365403 |
| 84  | rs35731545  | 4.83E-05 | 22.00 | T | C | -3.68E-02 | 7.56E-03 | 1.10E-06 | 455314 | 8.78E-03  | 7.84E-03 | 2.63E-01 | 365403 |
| 85  | rs3770007   | 5.71E-05 | 26.02 | C | T | 1.64E-02  | 3.00E-03 | 5.10E-08 | 455314 | -2.10E-03 | 3.18E-03 | 5.08E-01 | 365403 |
| 86  | rs3809711   | 5.06E-05 | 23.05 | A | G | 2.25E-02  | 4.56E-03 | 8.30E-07 | 455314 | -2.80E-03 | 4.80E-03 | 5.59E-01 | 365403 |
| 87  | rs4334436   | 5.04E-05 | 22.96 | A | G | -1.09E-02 | 2.12E-03 | 3.20E-07 | 455314 | 9.15E-04  | 2.23E-03 | 6.82E-01 | 365403 |
| 88  | rs440354    | 4.20E-05 | 19.12 | A | G | 1.11E-02  | 2.40E-03 | 3.50E-06 | 455314 | -5.56E-03 | 2.53E-03 | 2.83E-02 | 365403 |
| 89  | rs45566035  | 4.27E-05 | 19.46 | A | C | 3.83E-02  | 8.27E-03 | 3.60E-06 | 455314 | -1.16E-02 | 8.64E-03 | 1.81E-01 | 365403 |
| 90  | rs4633248   | 5.33E-05 | 24.25 | T | C | 1.13E-02  | 2.18E-03 | 2.00E-07 | 455314 | -1.67E-04 | 2.30E-03 | 9.42E-01 | 365403 |
| 91  | rs4673633   | 4.49E-05 | 20.46 | A | G | -1.30E-02 | 2.74E-03 | 1.80E-06 | 455314 | 4.49E-03  | 2.88E-03 | 1.20E-01 | 365403 |
| 92  | rs4692550   | 4.53E-05 | 20.64 | G | A | 1.00E-02  | 2.07E-03 | 1.30E-06 | 455314 | 2.99E-03  | 2.16E-03 | 1.66E-01 | 365403 |
| 93  | rs4760076   | 4.41E-05 | 20.09 | G | T | -1.06E-02 | 2.24E-03 | 2.10E-06 | 455314 | -2.51E-03 | 2.34E-03 | 2.83E-01 | 365403 |
| 94  | rs4788565   | 5.99E-05 | 27.27 | A | G | -2.19E-02 | 3.99E-03 | 4.10E-08 | 455314 | 6.70E-03  | 4.16E-03 | 1.07E-01 | 365403 |
| 95  | rs4965742   | 5.69E-05 | 25.91 | G | A | 2.28E-02  | 4.28E-03 | 9.80E-08 | 455314 | -1.45E-03 | 4.45E-03 | 7.44E-01 | 365403 |
| 96  | rs55692328  | 5.00E-05 | 22.75 | A | G | -1.53E-02 | 3.01E-03 | 3.90E-07 | 455314 | 3.87E-03  | 3.16E-03 | 2.20E-01 | 365403 |
| 97  | rs57094102  | 4.81E-05 | 21.92 | A | G | 2.37E-02  | 4.74E-03 | 6.10E-07 | 455314 | -2.40E-03 | 5.02E-03 | 6.32E-01 | 365403 |
| 98  | rs57548641  | 4.19E-05 | 19.08 | G | A | -2.75E-02 | 5.96E-03 | 3.80E-06 | 455314 | 1.23E-02  | 6.26E-03 | 4.95E-02 | 365403 |
| 99  | rs5768182   | 4.22E-05 | 19.22 | G | A | 9.91E-03  | 2.14E-03 | 3.50E-06 | 455314 | -1.79E-03 | 2.22E-03 | 4.21E-01 | 365403 |
| 100 | rs57900082  | 4.35E-05 | 19.80 | G | A | 1.23E-02  | 2.61E-03 | 2.30E-06 | 455314 | -2.96E-03 | 2.74E-03 | 2.79E-01 | 365403 |
| 101 | rs60304336  | 6.12E-05 | 27.87 | T | G | 2.79E-02  | 5.03E-03 | 2.80E-08 | 455314 | -2.27E-03 | 5.28E-03 | 6.68E-01 | 365403 |
| 102 | rs61620752  | 6.52E-05 | 29.71 | G | T | 1.61E-02  | 2.77E-03 | 6.40E-09 | 455314 | 3.18E-03  | 2.90E-03 | 2.73E-01 | 365403 |
| 103 | rs61875074  | 6.71E-05 | 30.56 | C | A | 2.23E-02  | 3.84E-03 | 6.80E-09 | 455314 | -6.48E-03 | 4.03E-03 | 1.08E-01 | 365403 |
| 104 | rs61882742  | 4.82E-05 | 21.94 | C | A | -1.07E-02 | 2.14E-03 | 6.20E-07 | 455314 | -5.63E-04 | 2.23E-03 | 8.01E-01 | 365403 |
| 105 | rs62118471  | 4.63E-05 | 21.07 | C | T | 2.95E-02  | 6.41E-03 | 4.40E-06 | 455314 | 7.74E-04  | 6.69E-03 | 9.08E-01 | 365403 |
| 106 | rs62299683  | 5.15E-05 | 23.47 | G | A | -1.41E-02 | 2.81E-03 | 5.20E-07 | 455314 | 3.20E-03  | 2.92E-03 | 2.73E-01 | 365403 |
| 107 | rs62370429  | 7.45E-05 | 33.91 | C | T | -2.62E-02 | 4.35E-03 | 1.80E-09 | 455314 | 2.59E-05  | 4.55E-03 | 9.95E-01 | 365403 |
| 108 | rs62521107  | 4.71E-05 | 21.45 | T | C | -3.44E-02 | 7.15E-03 | 1.50E-06 | 455314 | 5.25E-03  | 7.41E-03 | 4.79E-01 | 365403 |
| 109 | rs6447363   | 4.45E-05 | 20.25 | A | G | 1.03E-02  | 2.15E-03 | 1.60E-06 | 455314 | -2.35E-03 | 2.25E-03 | 2.97E-01 | 365403 |
| 110 | rs6793835   | 6.55E-05 | 29.82 | A | G | -1.30E-02 | 2.24E-03 | 6.60E-09 | 455314 | 2.92E-03  | 2.34E-03 | 2.12E-01 | 365403 |
| 111 | rs6880443   | 4.75E-05 | 21.64 | A | G | 5.73E-02  | 1.18E-02 | 1.10E-06 | 455314 | 1.87E-02  | 1.26E-02 | 1.38E-01 | 365403 |
| 112 | rs7039140   | 4.20E-05 | 19.11 | C | T | 9.64E-03  | 2.07E-03 | 3.30E-06 | 455314 | -4.04E-03 | 2.16E-03 | 6.13E-02 | 365403 |
| 113 | rs708986    | 4.12E-05 | 18.76 | A | C | -1.06E-02 | 2.29E-03 | 3.80E-06 | 455314 | -9.88E-04 | 2.39E-03 | 6.80E-01 | 365403 |
| 114 | rs7130576   | 4.20E-05 | 19.12 | T | G | 9.66E-03  | 2.08E-03 | 3.40E-06 | 455314 | 8.43E-04  | 2.18E-03 | 6.99E-01 | 365403 |
| 115 | rs7134253   | 4.76E-05 | 21.67 | T | C | -1.13E-02 | 2.27E-03 | 7.30E-07 | 455314 | 3.06E-04  | 2.38E-03 | 8.98E-01 | 365403 |
| 116 | rs7148769   | 5.59E-05 | 25.47 | T | C | -1.28E-02 | 2.39E-03 | 8.10E-08 | 455314 | 2.64E-03  | 2.49E-03 | 2.89E-01 | 365403 |
| 117 | rs7200852   | 6.17E-05 | 28.12 | A | C | -2.44E-02 | 4.45E-03 | 4.00E-08 | 455314 | 2.86E-03  | 4.73E-03 | 5.45E-01 | 365403 |
| 118 | rs7249925   | 4.87E-05 | 22.16 | G | A | 1.17E-02  | 2.34E-03 | 5.20E-07 | 455314 | 2.50E-03  | 2.44E-03 | 3.06E-01 | 365403 |
| 119 | rs72795429  | 5.54E-05 | 25.21 | T | C | -3.09E-02 | 5.77E-03 | 8.80E-08 | 455314 | 6.20E-03  | 5.93E-03 | 2.96E-01 | 365403 |
| 120 | rs7313274   | 4.45E-05 | 20.25 | A | C | -9.84E-03 | 2.05E-03 | 1.60E-06 | 455314 | -1.94E-03 | 2.14E-03 | 3.66E-01 | 365403 |
| 121 | rs7380478   | 4.46E-05 | 20.32 | T | C | 9.49E-03  | 1.97E-03 | 1.50E-06 | 455314 | -3.39E-03 | 2.06E-03 | 9.88E-02 | 365403 |
| 122 | rs74247887  | 7.69E-05 | 35.03 | T | C | 3.71E-02  | 5.88E-03 | 2.70E-10 | 455314 | 8.47E-03  | 6.19E-03 | 1.71E-01 | 365403 |
| 123 | rs74315563  | 4.13E-05 | 18.78 | T | C | -3.90E-02 | 8.51E-03 | 4.50E-06 | 455314 | 1.58E-02  | 8.92E-03 | 7.76E-02 | 365403 |
| 124 | rs7440783   | 4.13E-05 | 18.81 | T | C | -9.12E-03 | 1.98E-03 | 3.90E-06 | 455314 | -1.59E-03 | 2.06E-03 | 4.42E-01 | 365403 |
| 125 | rs74444373  | 5.75E-05 | 26.20 | A | G | 2.02E-02  | 3.72E-03 | 6.00E-08 | 455314 | 1.47E-04  | 3.87E-03 | 9.70E-01 | 365403 |

|     |            |          |       |   |   |           |          |          |        |           |          |          |        |
|-----|------------|----------|-------|---|---|-----------|----------|----------|--------|-----------|----------|----------|--------|
| 126 | rs74892223 | 4.98E-05 | 22.66 | G | A | 3.84E-02  | 7.56E-03 | 3.90E-07 | 455314 | -3.33E-03 | 7.93E-03 | 6.74E-01 | 365403 |
| 127 | rs7553571  | 4.90E-05 | 22.31 | G | A | 9.94E-03  | 1.99E-03 | 5.50E-07 | 455314 | -5.38E-04 | 2.08E-03 | 7.96E-01 | 365403 |
| 128 | rs75614542 | 4.66E-05 | 21.24 | C | A | -2.53E-02 | 5.15E-03 | 8.90E-07 | 455314 | 4.32E-03  | 5.35E-03 | 4.20E-01 | 365403 |
| 129 | rs75945249 | 4.50E-05 | 20.50 | C | T | -3.85E-02 | 7.96E-03 | 1.30E-06 | 455314 | 2.01E-03  | 8.39E-03 | 8.10E-01 | 365403 |
| 130 | rs76425335 | 4.76E-05 | 21.68 | A | G | -2.40E-02 | 4.94E-03 | 1.20E-06 | 455314 | 1.02E-02  | 5.17E-03 | 4.76E-02 | 365403 |
| 131 | rs7645358  | 4.78E-05 | 21.76 | G | A | 1.52E-02  | 3.10E-03 | 9.70E-07 | 455314 | 9.67E-04  | 3.24E-03 | 7.65E-01 | 365403 |
| 132 | rs76646807 | 4.69E-05 | 21.36 | T | C | -2.60E-02 | 5.32E-03 | 1.10E-06 | 455314 | 9.94E-03  | 5.53E-03 | 7.24E-02 | 365403 |
| 133 | rs76881430 | 4.39E-05 | 19.98 | G | T | -2.50E-02 | 5.24E-03 | 1.90E-06 | 455314 | -5.84E-03 | 5.46E-03 | 2.85E-01 | 365403 |
| 134 | rs77056472 | 4.79E-05 | 21.83 | G | A | 2.35E-02  | 4.78E-03 | 9.00E-07 | 455314 | -6.64E-04 | 4.97E-03 | 8.94E-01 | 365403 |
| 135 | rs77199539 | 4.04E-05 | 18.39 | T | C | -2.47E-02 | 5.40E-03 | 4.80E-06 | 455314 | 1.17E-02  | 5.64E-03 | 3.73E-02 | 365403 |
| 136 | rs77454912 | 4.18E-05 | 19.05 | T | C | 1.94E-02  | 4.21E-03 | 4.10E-06 | 455314 | 1.94E-03  | 4.41E-03 | 6.59E-01 | 365403 |
| 137 | rs77857236 | 4.21E-05 | 19.18 | C | A | 2.17E-02  | 4.66E-03 | 3.10E-06 | 455314 | -4.10E-03 | 4.86E-03 | 3.99E-01 | 365403 |
| 138 | rs77863898 | 5.62E-05 | 25.60 | T | C | -2.04E-02 | 4.08E-03 | 5.60E-07 | 455314 | 4.66E-04  | 4.24E-03 | 9.12E-01 | 365403 |
| 139 | rs7825598  | 5.01E-05 | 22.82 | G | A | 1.62E-02  | 3.19E-03 | 3.90E-07 | 455314 | 2.70E-03  | 3.32E-03 | 4.16E-01 | 365403 |
| 140 | rs78267018 | 4.09E-05 | 18.64 | C | T | -3.43E-02 | 7.46E-03 | 4.20E-06 | 455314 | 1.98E-03  | 7.89E-03 | 8.02E-01 | 365403 |
| 141 | rs78723881 | 4.29E-05 | 19.53 | G | T | 1.38E-02  | 2.97E-03 | 3.50E-06 | 455314 | -3.06E-03 | 3.09E-03 | 3.22E-01 | 365403 |
| 142 | rs78794032 | 4.85E-05 | 22.09 | T | C | -6.47E-02 | 1.34E-02 | 1.30E-06 | 455314 | 1.40E-02  | 1.39E-02 | 3.12E-01 | 365403 |
| 143 | rs79056516 | 5.15E-05 | 23.46 | G | A | -3.13E-02 | 6.32E-03 | 7.10E-07 | 455314 | 1.13E-02  | 6.65E-03 | 8.85E-02 | 365403 |
| 144 | rs79141939 | 4.97E-05 | 22.64 | A | G | -1.66E-02 | 3.35E-03 | 7.10E-07 | 455314 | 3.86E-03  | 3.49E-03 | 2.69E-01 | 365403 |
| 145 | rs7926943  | 4.70E-05 | 21.39 | T | C | 1.09E-02  | 2.23E-03 | 1.00E-06 | 455314 | -2.53E-03 | 2.34E-03 | 2.79E-01 | 365403 |
| 146 | rs79431487 | 4.31E-05 | 19.63 | G | T | -3.40E-02 | 7.30E-03 | 3.30E-06 | 455314 | 7.39E-03  | 7.66E-03 | 3.35E-01 | 365403 |
| 147 | rs80055518 | 4.45E-05 | 20.28 | C | A | 3.57E-02  | 7.53E-03 | 2.10E-06 | 455314 | -8.75E-05 | 8.12E-03 | 9.91E-01 | 365403 |
| 148 | rs80184318 | 5.86E-05 | 26.66 | A | G | 4.07E-02  | 8.64E-03 | 2.40E-06 | 455314 | 1.21E-02  | 9.02E-03 | 1.78E-01 | 365403 |
| 149 | rs915895   | 5.13E-05 | 23.36 | C | T | -1.05E-02 | 2.04E-03 | 2.60E-07 | 455314 | 2.01E-03  | 2.16E-03 | 3.50E-01 | 365403 |
| 150 | rs9510651  | 4.31E-05 | 19.64 | C | T | -2.16E-02 | 4.65E-03 | 3.50E-06 | 455314 | 4.98E-04  | 4.83E-03 | 9.18E-01 | 365403 |
| 151 | rs9529552  | 5.82E-05 | 26.51 | G | A | -2.49E-02 | 4.58E-03 | 5.60E-08 | 455314 | 2.29E-03  | 4.71E-03 | 6.27E-01 | 365403 |
| 152 | rs9640029  | 9.51E-05 | 43.29 | T | C | -1.38E-02 | 1.97E-03 | 2.70E-12 | 455314 | -2.26E-03 | 2.09E-03 | 2.80E-01 | 365403 |
| 153 | rs9655078  | 4.33E-05 | 19.71 | T | G | 9.33E-03  | 1.97E-03 | 2.30E-06 | 455314 | -1.21E-03 | 2.09E-03 | 5.61E-01 | 365403 |
| 154 | rs978504   | 4.17E-05 | 18.97 | C | T | -2.46E-02 | 5.37E-03 | 4.50E-06 | 455314 | -2.64E-03 | 5.65E-03 | 6.41E-01 | 365403 |
| 155 | rs9792187  | 5.31E-05 | 24.19 | T | C | 1.54E-02  | 2.94E-03 | 1.80E-07 | 455314 | 9.66E-04  | 3.09E-03 | 7.55E-01 | 365403 |
| 156 | rs9890345  | 4.71E-05 | 21.45 | C | T | 1.39E-02  | 2.81E-03 | 8.40E-07 | 455314 | -1.41E-03 | 2.94E-03 | 6.33E-01 | 365403 |

Nitrogen dioxide

|    |             |          |       |   |   |           |          |          |        |           |          |          |        |
|----|-------------|----------|-------|---|---|-----------|----------|----------|--------|-----------|----------|----------|--------|
| 1  | rs10088346  | 4.45E-05 | 20.30 | T | C | 1.14E-02  | 2.44E-03 | 3.10E-06 | 456380 | -4.55E-03 | 2.48E-03 | 6.64E-02 | 365403 |
| 2  | rs10144194  | 4.30E-05 | 19.62 | A | G | 2.49E-02  | 5.44E-03 | 4.80E-06 | 456380 | 7.58E-03  | 5.51E-03 | 1.69E-01 | 365403 |
| 3  | rs10498638  | 5.04E-05 | 23.00 | C | T | 1.28E-02  | 2.61E-03 | 8.70E-07 | 456380 | -2.60E-03 | 2.64E-03 | 3.24E-01 | 365403 |
| 4  | rs10983735  | 6.95E-05 | 31.72 | A | G | 1.63E-02  | 2.80E-03 | 5.90E-09 | 456380 | 2.13E-03  | 2.85E-03 | 4.55E-01 | 365403 |
| 5  | rs111288222 | 4.71E-05 | 21.50 | T | C | -3.84E-02 | 8.24E-03 | 3.10E-06 | 456380 | 1.44E-02  | 8.40E-03 | 8.66E-02 | 365403 |
| 6  | rs112429058 | 4.98E-05 | 22.74 | G | A | 2.60E-02  | 5.29E-03 | 8.70E-07 | 456380 | -8.52E-04 | 5.40E-03 | 8.75E-01 | 365403 |
| 7  | rs114026032 | 4.67E-05 | 21.32 | A | G | -3.06E-02 | 6.46E-03 | 2.10E-06 | 456380 | -5.67E-03 | 6.54E-03 | 3.85E-01 | 365403 |
| 8  | rs114789974 | 4.43E-05 | 20.22 | A | C | -4.63E-02 | 9.93E-03 | 3.20E-06 | 456380 | 1.09E-02  | 1.02E-02 | 2.84E-01 | 365403 |
| 9  | rs116289821 | 5.03E-05 | 22.95 | A | G | -3.38E-02 | 6.86E-03 | 8.60E-07 | 456380 | -2.83E-03 | 6.82E-03 | 6.79E-01 | 365403 |
| 10 | rs11668896  | 4.65E-05 | 21.23 | C | T | 1.07E-02  | 2.25E-03 | 2.20E-06 | 456380 | -5.52E-03 | 2.28E-03 | 1.53E-02 | 365403 |
| 11 | rs11682045  | 4.85E-05 | 22.14 | A | G | -1.01E-02 | 2.08E-03 | 1.20E-06 | 456380 | 3.39E-03  | 2.13E-03 | 1.12E-01 | 365403 |
| 12 | rs117866184 | 4.57E-05 | 20.85 | A | G | -4.42E-02 | 9.54E-03 | 3.50E-06 | 456380 | -6.49E-04 | 9.61E-03 | 9.46E-01 | 365403 |
| 13 | rs11852894  | 4.34E-05 | 19.79 | T | C | 1.85E-02  | 4.06E-03 | 4.80E-06 | 456380 | 6.70E-03  | 4.12E-03 | 1.04E-01 | 365403 |
| 14 | rs12125927  | 4.84E-05 | 22.09 | A | G | -1.81E-02 | 3.88E-03 | 3.20E-06 | 456380 | 8.16E-03  | 3.92E-03 | 3.72E-02 | 365403 |
| 15 | rs12541555  | 4.37E-05 | 19.94 | A | C | -1.12E-02 | 2.43E-03 | 4.00E-06 | 456380 | 3.24E-04  | 2.46E-03 | 8.95E-01 | 365403 |
| 16 | rs13122455  | 4.32E-05 | 19.70 | T | C | -1.16E-02 | 2.54E-03 | 4.70E-06 | 456380 | 2.33E-03  | 2.58E-03 | 3.66E-01 | 365403 |
| 17 | rs1340900   | 4.41E-05 | 20.11 | A | G | 9.52E-03  | 2.06E-03 | 3.60E-06 | 456380 | 5.38E-04  | 2.08E-03 | 7.96E-01 | 365403 |
| 18 | rs1374518   | 4.77E-05 | 21.78 | A | G | -9.91E-03 | 2.05E-03 | 1.40E-06 | 456380 | -7.16E-05 | 2.08E-03 | 9.73E-01 | 365403 |
| 19 | rs143998384 | 4.98E-05 | 22.71 | G | A | 4.11E-02  | 8.79E-03 | 2.90E-06 | 456380 | 1.87E-02  | 9.03E-03 | 3.87E-02 | 365403 |
| 20 | rs1441961   | 4.75E-05 | 21.69 | C | T | -9.84E-03 | 2.05E-03 | 1.60E-06 | 456380 | 3.75E-03  | 2.08E-03 | 7.13E-02 | 365403 |
| 21 | rs145935842 | 4.92E-05 | 22.45 | G | A | -4.48E-02 | 9.22E-03 | 1.20E-06 | 456380 | 1.40E-02  | 9.30E-03 | 1.33E-01 | 365403 |
| 22 | rs146690527 | 5.73E-05 | 26.17 | A | G | -6.56E-02 | 1.31E-02 | 5.60E-07 | 456380 | -2.74E-04 | 1.32E-02 | 9.84E-01 | 365403 |
| 23 | rs1488708   | 4.67E-05 | 21.33 | C | T | 9.67E-03  | 2.04E-03 | 2.10E-06 | 456380 | -3.14E-03 | 2.06E-03 | 1.28E-01 | 365403 |
| 24 | rs149714494 | 5.24E-05 | 23.94 | A | G | 3.73E-02  | 7.96E-03 | 2.80E-06 | 456380 | 2.75E-03  | 8.12E-03 | 7.35E-01 | 365403 |
| 25 | rs149827261 | 5.65E-05 | 25.77 | T | G | -1.50E-02 | 2.92E-03 | 2.70E-07 | 456380 | -5.28E-03 | 2.97E-03 | 7.52E-02 | 365403 |
| 26 | rs1502243   | 5.02E-05 | 22.92 | A | G | -1.17E-02 | 2.37E-03 | 7.70E-07 | 456380 | -7.57E-04 | 2.41E-03 | 7.53E-01 | 365403 |
| 27 | rs180672921 | 4.71E-05 | 21.52 | A | G | -4.09E-02 | 8.88E-03 | 4.00E-06 | 456380 | 7.63E-03  | 8.86E-03 | 3.89E-01 | 365403 |
| 28 | rs2464873   | 4.87E-05 | 22.22 | T | C | -9.87E-03 | 2.03E-03 | 1.20E-06 | 456380 | -3.67E-03 | 2.09E-03 | 7.82E-02 | 365403 |
| 29 | rs2517897   | 5.42E-05 | 24.74 | A | C | 1.45E-02  | 2.81E-03 | 2.70E-07 | 456380 | 1.43E-03  | 2.88E-03 | 6.20E-01 | 365403 |

|    |            |          |       |   |   |           |          |          |        |           |          |          |        |
|----|------------|----------|-------|---|---|-----------|----------|----------|--------|-----------|----------|----------|--------|
| 30 | rs35675286 | 4.89E-05 | 22.31 | A | G | 2.98E-02  | 6.44E-03 | 3.70E-06 | 456380 | -5.33E-04 | 6.61E-03 | 9.36E-01 | 365403 |
| 31 | rs35706972 | 5.26E-05 | 24.02 | A | G | 4.33E-02  | 8.74E-03 | 7.40E-07 | 456380 | -4.79E-03 | 8.90E-03 | 5.91E-01 | 365403 |
| 32 | rs35731545 | 5.48E-05 | 25.02 | T | C | -3.92E-02 | 7.77E-03 | 4.60E-07 | 456380 | 8.78E-03  | 7.84E-03 | 2.63E-01 | 365403 |
| 33 | rs3859018  | 4.40E-05 | 20.07 | A | G | -3.12E-02 | 6.75E-03 | 3.90E-06 | 456380 | 1.60E-02  | 6.90E-03 | 2.05E-02 | 365403 |
| 34 | rs3991894  | 4.46E-05 | 20.34 | T | C | -1.37E-02 | 2.98E-03 | 4.10E-06 | 456380 | 2.31E-03  | 3.01E-03 | 4.42E-01 | 365403 |
| 35 | rs4368946  | 4.73E-05 | 21.61 | C | T | 2.01E-02  | 4.20E-03 | 1.80E-06 | 456380 | -5.31E-03 | 4.34E-03 | 2.21E-01 | 365403 |
| 36 | rs4671893  | 5.08E-05 | 23.16 | G | A | -1.13E-02 | 2.30E-03 | 1.00E-06 | 456380 | -2.83E-03 | 2.35E-03 | 2.28E-01 | 365403 |
| 37 | rs4736716  | 4.85E-05 | 22.12 | A | G | -1.08E-02 | 2.25E-03 | 1.40E-06 | 456380 | 3.49E-03  | 2.27E-03 | 1.24E-01 | 365403 |
| 38 | rs4932780  | 4.83E-05 | 22.03 | T | C | 2.79E-02  | 5.74E-03 | 1.20E-06 | 456380 | -3.09E-03 | 5.92E-03 | 6.01E-01 | 365403 |
| 39 | rs533745   | 4.89E-05 | 22.31 | A | G | 1.01E-02  | 2.08E-03 | 1.10E-06 | 456380 | -2.82E-03 | 2.12E-03 | 1.84E-01 | 365403 |
| 40 | rs55643000 | 5.26E-05 | 24.02 | G | T | -2.13E-02 | 4.24E-03 | 5.30E-07 | 456380 | 2.30E-03  | 4.25E-03 | 5.88E-01 | 365403 |
| 41 | rs6101627  | 4.33E-05 | 19.74 | T | C | 1.33E-02  | 2.90E-03 | 4.40E-06 | 456380 | -2.74E-03 | 2.97E-03 | 3.56E-01 | 365403 |
| 42 | rs62062033 | 5.88E-05 | 26.83 | T | C | 1.44E-02  | 2.72E-03 | 1.30E-07 | 456380 | -3.81E-04 | 2.76E-03 | 8.90E-01 | 365403 |
| 43 | rs62112215 | 4.69E-05 | 21.43 | T | G | -1.30E-02 | 2.72E-03 | 1.90E-06 | 456380 | -5.20E-03 | 2.76E-03 | 5.96E-02 | 365403 |
| 44 | rs62180536 | 5.79E-05 | 26.43 | T | C | -3.21E-02 | 6.08E-03 | 1.30E-07 | 456380 | -8.62E-03 | 6.18E-03 | 1.64E-01 | 365403 |
| 45 | rs6658422  | 4.95E-05 | 22.60 | T | C | 2.49E-02  | 5.05E-03 | 8.30E-07 | 456380 | -7.28E-03 | 5.25E-03 | 1.66E-01 | 365403 |
| 46 | rs6724825  | 4.40E-05 | 20.10 | A | G | 1.06E-02  | 2.29E-03 | 3.90E-06 | 456380 | 1.22E-05  | 2.34E-03 | 9.96E-01 | 365403 |
| 47 | rs6809736  | 4.76E-05 | 21.73 | A | G | 1.55E-02  | 3.27E-03 | 2.00E-06 | 456380 | -7.23E-03 | 3.29E-03 | 2.81E-02 | 365403 |
| 48 | rs6954825  | 5.34E-05 | 24.37 | C | T | 1.41E-02  | 2.76E-03 | 3.20E-07 | 456380 | -3.61E-03 | 2.85E-03 | 2.05E-01 | 365403 |
| 49 | rs714020   | 4.44E-05 | 20.27 | T | C | 1.12E-02  | 2.41E-03 | 3.50E-06 | 456380 | -3.41E-03 | 2.46E-03 | 1.64E-01 | 365403 |
| 50 | rs72795429 | 4.49E-05 | 20.51 | T | C | -2.78E-02 | 5.94E-03 | 2.80E-06 | 456380 | 6.20E-03  | 5.93E-03 | 2.96E-01 | 365403 |
| 51 | rs72839513 | 5.12E-05 | 23.37 | A | G | 2.09E-02  | 4.19E-03 | 6.00E-07 | 456380 | 1.00E-03  | 4.29E-03 | 8.15E-01 | 365403 |
| 52 | rs73151438 | 7.78E-05 | 35.49 | A | C | 2.18E-02  | 4.65E-03 | 2.90E-06 | 456380 | 7.75E-03  | 4.75E-03 | 1.03E-01 | 365403 |
| 53 | rs73178577 | 5.11E-05 | 23.34 | A | C | 1.84E-02  | 3.69E-03 | 6.50E-07 | 456380 | -1.71E-03 | 3.78E-03 | 6.52E-01 | 365403 |
| 54 | rs73596615 | 4.69E-05 | 21.38 | A | G | 1.42E-02  | 2.96E-03 | 1.70E-06 | 456380 | -3.94E-03 | 3.01E-03 | 1.91E-01 | 365403 |
| 55 | rs74818319 | 5.35E-05 | 24.41 | A | G | 4.17E-02  | 8.84E-03 | 2.40E-06 | 456380 | -1.53E-03 | 9.26E-03 | 8.69E-01 | 365403 |
| 56 | rs75801541 | 4.35E-05 | 19.87 | A | G | -2.08E-02 | 4.51E-03 | 4.00E-06 | 456380 | -4.14E-03 | 4.52E-03 | 3.60E-01 | 365403 |
| 57 | rs76682037 | 5.17E-05 | 23.58 | G | A | -4.94E-02 | 9.83E-03 | 5.00E-07 | 456380 | -7.63E-03 | 9.89E-03 | 4.40E-01 | 365403 |
| 58 | rs77338596 | 4.51E-05 | 20.60 | C | T | -1.60E-02 | 3.43E-03 | 2.80E-06 | 456380 | 3.67E-03  | 3.43E-03 | 2.85E-01 | 365403 |
| 59 | rs78230451 | 4.44E-05 | 20.28 | T | C | -1.48E-02 | 3.20E-03 | 3.40E-06 | 456380 | -3.64E-03 | 3.24E-03 | 2.61E-01 | 365403 |
| 60 | rs78387400 | 4.79E-05 | 21.88 | A | G | 2.78E-02  | 5.79E-03 | 1.50E-06 | 456380 | 4.31E-04  | 5.98E-03 | 9.43E-01 | 365403 |
| 61 | rs78887867 | 5.31E-05 | 24.22 | A | G | -2.10E-02 | 4.32E-03 | 1.20E-06 | 456380 | -3.29E-03 | 4.35E-03 | 4.50E-01 | 365403 |
| 62 | rs78991270 | 4.31E-05 | 19.66 | A | C | -2.17E-02 | 4.74E-03 | 4.70E-06 | 456380 | 2.66E-04  | 4.87E-03 | 9.56E-01 | 365403 |
| 63 | rs7940779  | 4.76E-05 | 21.71 | T | C | 2.34E-02  | 4.88E-03 | 1.60E-06 | 456380 | 9.39E-04  | 5.04E-03 | 8.52E-01 | 365403 |
| 64 | rs79475047 | 5.69E-05 | 25.98 | C | T | 3.27E-02  | 6.20E-03 | 1.30E-07 | 456380 | -1.21E-02 | 6.43E-03 | 5.96E-02 | 365403 |
| 65 | rs8046866  | 4.37E-05 | 19.95 | A | G | 9.63E-03  | 2.10E-03 | 4.40E-06 | 456380 | 1.45E-03  | 2.13E-03 | 4.94E-01 | 365403 |
| 66 | rs8106     | 4.84E-05 | 22.07 | G | A | -1.87E-02 | 3.85E-03 | 1.10E-06 | 456380 | 3.90E-05  | 3.90E-03 | 9.92E-01 | 365403 |
| 67 | rs844729   | 4.73E-05 | 21.59 | A | G | -1.06E-02 | 2.22E-03 | 1.70E-06 | 456380 | 1.49E-04  | 2.28E-03 | 9.48E-01 | 365403 |
| 68 | rs9541967  | 5.62E-05 | 25.65 | C | T | -1.61E-02 | 3.08E-03 | 1.60E-07 | 456380 | -4.18E-03 | 3.10E-03 | 1.78E-01 | 365403 |
| 69 | rs974801   | 5.30E-05 | 24.21 | G | A | 1.07E-02  | 2.10E-03 | 3.60E-07 | 456380 | -1.47E-03 | 2.14E-03 | 4.91E-01 | 365403 |
| 70 | rs9805280  | 4.65E-05 | 21.23 | A | G | 1.07E-02  | 2.26E-03 | 2.00E-06 | 456380 | -2.25E-03 | 2.28E-03 | 3.24E-01 | 365403 |

Nitrogen oxides

|    |             |          |       |   |   |           |          |          |        |           |          |          |        |
|----|-------------|----------|-------|---|---|-----------|----------|----------|--------|-----------|----------|----------|--------|
| 1  | rs10172295  | 6.23E-05 | 28.46 | A | G | -1.13E-02 | 2.10E-03 | 6.80E-08 | 456380 | 3.38E-03  | 2.10E-03 | 1.07E-01 | 365403 |
| 2  | rs10515343  | 4.71E-05 | 21.49 | G | A | -4.42E-02 | 9.50E-03 | 3.30E-06 | 456380 | -3.12E-03 | 9.32E-03 | 7.38E-01 | 365403 |
| 3  | rs10848647  | 4.83E-05 | 22.07 | G | A | -9.99E-03 | 2.10E-03 | 1.90E-06 | 456380 | 2.22E-03  | 2.09E-03 | 2.88E-01 | 365403 |
| 4  | rs10852602  | 4.97E-05 | 22.70 | A | C | 1.33E-02  | 2.76E-03 | 1.30E-06 | 456380 | -5.35E-03 | 2.75E-03 | 5.14E-02 | 365403 |
| 5  | rs10983735  | 4.98E-05 | 22.72 | A | G | 1.38E-02  | 2.86E-03 | 1.40E-06 | 456380 | 2.13E-03  | 2.85E-03 | 4.55E-01 | 365403 |
| 6  | rs11016225  | 4.54E-05 | 20.74 | G | A | -9.73E-03 | 2.11E-03 | 3.80E-06 | 456380 | -1.49E-03 | 2.10E-03 | 4.79E-01 | 365403 |
| 7  | rs11049241  | 5.71E-05 | 26.04 | A | C | 1.37E-02  | 2.65E-03 | 2.40E-07 | 456380 | 2.90E-03  | 2.65E-03 | 2.73E-01 | 365403 |
| 8  | rs117878224 | 4.79E-05 | 21.84 | G | A | -4.55E-02 | 9.67E-03 | 2.50E-06 | 456380 | 8.64E-03  | 9.69E-03 | 3.73E-01 | 365403 |
| 9  | rs11855821  | 5.68E-05 | 25.94 | A | G | -1.18E-02 | 2.34E-03 | 4.00E-07 | 456380 | -2.62E-03 | 2.32E-03 | 2.58E-01 | 365403 |
| 10 | rs1217106   | 7.22E-05 | 32.93 | G | A | 1.46E-02  | 2.52E-03 | 7.50E-09 | 456380 | -2.83E-03 | 2.49E-03 | 2.55E-01 | 365403 |
| 11 | rs12203592  | 1.29E-04 | 58.67 | T | C | 1.94E-02  | 2.46E-03 | 3.20E-15 | 456380 | -2.03E-03 | 2.57E-03 | 4.30E-01 | 365403 |
| 12 | rs12229183  | 5.01E-05 | 22.88 | A | C | 1.23E-02  | 2.53E-03 | 1.20E-06 | 456380 | -3.02E-03 | 2.53E-03 | 2.32E-01 | 365403 |
| 13 | rs12637852  | 4.50E-05 | 20.54 | T | C | -1.05E-02 | 2.28E-03 | 4.30E-06 | 456380 | 2.32E-03  | 2.26E-03 | 3.06E-01 | 365403 |
| 14 | rs1318845   | 6.45E-05 | 29.42 | C | T | -1.42E-02 | 2.60E-03 | 4.80E-08 | 456380 | 4.06E-04  | 2.58E-03 | 8.75E-01 | 365403 |
| 15 | rs13421943  | 4.57E-05 | 20.85 | T | C | 1.43E-02  | 3.10E-03 | 4.40E-06 | 456380 | 4.94E-04  | 3.12E-03 | 8.74E-01 | 365403 |
| 16 | rs139916    | 4.86E-05 | 22.17 | A | G | 1.14E-02  | 2.41E-03 | 2.10E-06 | 456380 | -4.56E-04 | 2.40E-03 | 8.49E-01 | 365403 |
| 17 | rs144720952 | 6.92E-05 | 31.59 | G | A | 4.99E-02  | 9.76E-03 | 3.20E-07 | 456380 | 2.90E-03  | 9.70E-03 | 7.65E-01 | 365403 |
| 18 | rs1491722   | 4.57E-05 | 20.85 | G | A | -1.01E-02 | 2.20E-03 | 4.00E-06 | 456380 | -1.94E-03 | 2.19E-03 | 3.75E-01 | 365403 |
| 19 | rs17183854  | 6.05E-05 | 27.62 | G | T | -4.79E-02 | 9.09E-03 | 1.30E-07 | 456380 | -1.13E-03 | 9.10E-03 | 9.01E-01 | 365403 |

|    |            |          |       |   |   |           |          |          |        |           |          |          |        |
|----|------------|----------|-------|---|---|-----------|----------|----------|--------|-----------|----------|----------|--------|
| 20 | rs17183866 | 4.76E-05 | 21.73 | G | A | -1.42E-02 | 3.01E-03 | 2.50E-06 | 456380 | -3.10E-03 | 2.99E-03 | 3.01E-01 | 365403 |
| 21 | rs17513184 | 6.06E-05 | 27.64 | T | C | -1.99E-02 | 3.86E-03 | 2.30E-07 | 456380 | 3.35E-03  | 3.81E-03 | 3.79E-01 | 365403 |
| 22 | rs17657881 | 4.72E-05 | 21.53 | C | T | -3.67E-02 | 7.79E-03 | 2.50E-06 | 456380 | -1.32E-05 | 7.71E-03 | 9.99E-01 | 365403 |
| 23 | rs1960195  | 5.04E-05 | 23.02 | G | A | 1.80E-02  | 3.71E-03 | 1.20E-06 | 456380 | -1.72E-03 | 3.69E-03 | 6.41E-01 | 365403 |
| 24 | rs27152    | 6.29E-05 | 28.71 | T | C | -1.19E-02 | 2.21E-03 | 8.00E-08 | 456380 | 3.74E-03  | 2.20E-03 | 8.99E-02 | 365403 |
| 25 | rs272086   | 4.57E-05 | 20.84 | A | G | 1.08E-02  | 2.33E-03 | 3.90E-06 | 456380 | -3.51E-03 | 2.31E-03 | 1.29E-01 | 365403 |
| 26 | rs2838761  | 4.97E-05 | 22.70 | G | A | 1.48E-02  | 3.07E-03 | 1.40E-06 | 456380 | -3.94E-03 | 3.06E-03 | 1.98E-01 | 365403 |
| 27 | rs329177   | 5.62E-05 | 25.65 | A | G | 1.09E-02  | 2.18E-03 | 6.00E-07 | 456380 | -2.26E-03 | 2.17E-03 | 2.96E-01 | 365403 |
| 28 | rs34969378 | 5.54E-05 | 25.30 | A | G | -1.13E-02 | 2.22E-03 | 3.60E-07 | 456380 | 7.21E-04  | 2.24E-03 | 7.48E-01 | 365403 |
| 29 | rs35233950 | 4.70E-05 | 21.47 | T | C | -1.13E-02 | 2.43E-03 | 3.00E-06 | 456380 | 3.55E-03  | 2.43E-03 | 1.44E-01 | 365403 |
| 30 | rs4686547  | 4.96E-05 | 22.65 | G | T | 1.06E-02  | 2.20E-03 | 1.40E-06 | 456380 | 1.88E-04  | 2.19E-03 | 9.32E-01 | 365403 |
| 31 | rs4721275  | 5.12E-05 | 23.38 | T | C | -2.64E-02 | 5.38E-03 | 9.40E-07 | 456380 | 1.06E-02  | 5.47E-03 | 5.32E-02 | 365403 |
| 32 | rs4838594  | 4.81E-05 | 21.97 | C | T | 1.15E-02  | 2.43E-03 | 2.30E-06 | 456380 | 3.90E-04  | 2.44E-03 | 8.73E-01 | 365403 |
| 33 | rs55974805 | 4.72E-05 | 21.53 | T | C | -1.13E-02 | 2.40E-03 | 2.60E-06 | 456380 | 1.80E-03  | 2.41E-03 | 4.56E-01 | 365403 |
| 34 | rs58824859 | 5.42E-05 | 24.75 | C | A | 1.08E-02  | 2.21E-03 | 1.00E-06 | 456380 | 1.87E-03  | 2.20E-03 | 3.95E-01 | 365403 |
| 35 | rs62119705 | 4.63E-05 | 21.14 | T | C | 1.01E-02  | 2.18E-03 | 3.10E-06 | 456380 | -4.79E-03 | 2.16E-03 | 2.65E-02 | 365403 |
| 36 | rs62459096 | 5.94E-05 | 27.12 | T | G | -2.13E-02 | 4.42E-03 | 1.40E-06 | 456380 | 1.35E-04  | 4.42E-03 | 9.76E-01 | 365403 |
| 37 | rs62484669 | 4.55E-05 | 20.76 | A | G | 1.61E-02  | 3.48E-03 | 3.90E-06 | 456380 | -4.48E-03 | 3.50E-03 | 2.00E-01 | 365403 |
| 38 | rs6667345  | 6.38E-05 | 29.13 | T | C | 1.27E-02  | 2.46E-03 | 2.20E-07 | 456380 | -2.69E-03 | 2.46E-03 | 2.74E-01 | 365403 |
| 39 | rs7169086  | 4.45E-05 | 20.32 | T | C | -1.11E-02 | 2.43E-03 | 4.70E-06 | 456380 | 2.65E-03  | 2.42E-03 | 2.73E-01 | 365403 |
| 40 | rs72654155 | 4.60E-05 | 20.97 | T | C | 1.33E-02  | 2.85E-03 | 3.40E-06 | 456380 | -3.23E-03 | 2.87E-03 | 2.60E-01 | 365403 |
| 41 | rs72655898 | 5.39E-05 | 24.62 | G | A | -1.15E-02 | 2.30E-03 | 6.00E-07 | 456380 | 7.15E-04  | 2.29E-03 | 7.55E-01 | 365403 |
| 42 | rs72808024 | 7.33E-05 | 33.46 | C | A | -1.70E-02 | 2.91E-03 | 4.60E-09 | 456380 | 6.60E-03  | 2.87E-03 | 2.14E-02 | 365403 |
| 43 | rs73085844 | 5.46E-05 | 24.91 | G | T | -3.31E-02 | 6.53E-03 | 4.00E-07 | 456380 | -2.76E-03 | 6.59E-03 | 6.76E-01 | 365403 |
| 44 | rs7519873  | 4.78E-05 | 21.82 | G | A | -1.12E-02 | 2.39E-03 | 2.50E-06 | 456380 | 2.36E-03  | 2.38E-03 | 3.23E-01 | 365403 |
| 45 | rs77039956 | 4.68E-05 | 21.35 | G | T | 2.74E-02  | 5.88E-03 | 3.20E-06 | 456380 | -3.58E-03 | 6.07E-03 | 5.55E-01 | 365403 |
| 46 | rs77160823 | 5.34E-05 | 24.35 | C | T | -1.74E-02 | 3.74E-03 | 3.30E-06 | 456380 | 6.95E-03  | 3.68E-03 | 5.88E-02 | 365403 |
| 47 | rs77255816 | 6.36E-05 | 29.03 | T | C | 2.99E-02  | 5.47E-03 | 4.60E-08 | 456380 | -9.86E-03 | 5.54E-03 | 7.51E-02 | 365403 |
| 48 | rs7776279  | 5.53E-05 | 25.26 | A | G | 1.17E-02  | 2.29E-03 | 3.70E-07 | 456380 | -4.19E-03 | 2.29E-03 | 6.77E-02 | 365403 |
| 49 | rs78379279 | 5.16E-05 | 23.56 | C | T | -3.44E-02 | 7.17E-03 | 1.60E-06 | 456380 | 8.46E-03  | 7.06E-03 | 2.31E-01 | 365403 |
| 50 | rs78539764 | 4.92E-05 | 22.45 | C | T | -3.02E-02 | 6.32E-03 | 1.80E-06 | 456380 | 1.24E-02  | 6.26E-03 | 4.84E-02 | 365403 |
| 51 | rs78969252 | 4.56E-05 | 20.83 | G | A | -3.76E-02 | 8.13E-03 | 3.60E-06 | 456380 | 1.02E-03  | 7.91E-03 | 8.98E-01 | 365403 |
| 52 | rs7910200  | 5.31E-05 | 24.21 | T | C | -1.04E-02 | 2.09E-03 | 6.10E-07 | 456380 | 3.22E-03  | 2.08E-03 | 1.22E-01 | 365403 |
| 53 | rs9495443  | 5.37E-05 | 24.50 | C | A | -1.10E-02 | 2.21E-03 | 7.10E-07 | 456380 | 2.75E-03  | 2.22E-03 | 2.15E-01 | 365403 |

---
